# Supplementary material for: People with IBD evidence more microarousals during sleep architecture assessments
Source: PubMed Central journal article supplement — BMJ Open Gastroenterol. 2023 Dec 28;10(1):e001249. doi: 10.1136/bmjgast-2023-001249 (PMC10759128; doi:10.1136/bmjgast-2023-001249), 2023-12-28
Supplement: bmjgast-2023-001249supp001.pdf [file bmjgast-2023-001249supp001.pdf]

## Supplementary Tables

Supplementary Table 1. Differences in sleep architecture in participants with IBD with and without insomnia.

|                               | IBD without insomnia     | IBD with insomnia                | Significance (t-test) |
|-------------------------------|--------------------------|----------------------------------|-----------------------|
| Sleep onset latency           | 9.08 minutes (SD=4.25)   | 25.56 minutes (SD=33.12)         | $p=0.25$              |
| Wake after sleep onset        | 39.17 minutes (SD=19.43) | 58.50 minutes (SD=26.11 minutes) | $p=0.15$              |
| Total sleep time              | 6.92 hours (SD=0.56)     | 6.60 hours (SD=1.88)             | $p=0.69$              |
| Sleep efficiency              | 89.41% (SD=5.11%)        | 76.66% (SD=15.71%)               | $p=0.08^a$            |
| REM latency                   | 67.92 minutes (SD=20.78) | 90.50 minutes (SD=35.74)         | $p=0.19$              |
| REM sleep %                   | 22.70% (SD=8.19%)        | 19.62% (SD=6.14%)                | $p=0.42$              |
| Stage 1 sleep (N1) %          | 4.97% (SD=2.45%)         | 5.20% (SD=3.10%)                 | $p=0.88$              |
| Stage 2 sleep (N2) %          | 46.36% (SD=13.92%)       | 36.48% (SD=14.44%)               | $p=0.21$              |
| Stage 3 sleep (N3) %          | 25.98% (SD=14.40%)       | 33.15% (SD=12.01%)               | $p=0.31$              |
| Microarousals                 | 14.08 (SD=7.30)          | 13.72 (SD=11.65)                 | $p=0.95$              |
| Awakenings                    | 30.58 (SD=13.44)         | 36.0 (SD=18.19)                  | $p=0.55$              |
| a. Trend toward significance. |                          |                                  |                       |

Supplementary Table 2. Differences in sleep architecture in participants with IBD with and without active disease.

|                        | IBD inactive disease     | IBD active disease       | Significance (t-test) |
|------------------------|--------------------------|--------------------------|-----------------------|
| Sleep onset latency    | 11.93 minutes (SD=7.64)  | 27.21 minutes (SD=37.85) | $p=0.32$              |
| Wake after sleep onset | 54.86 minutes (SD=27.37) | 50.57 minutes (SD=23.56) | $p=0.76$              |
| Total sleep time       | 7.28 hours (SD=0.56)     | 6.09 hours (SD=1.96)     | $p=0.17$              |
| Sleep efficiency       | 87.02% (SD=5.45%)        | 74.94% (SD=17.67%)       | $p=0.13$              |
| REM latency            | 81.64 minutes (SD=27.96) | 85.79 minutes (SD=37.42) | $p=0.82$              |
| REM sleep %            | 22.36% (SD=4.60%)        | 18.55% (SD=8.76%)        | $p=0.33$              |
| Stage 1 sleep (N1) %   | 5.01% (SD=2.89%)         | 5.10% (SD=3.06%)         | $p=0.95$              |
| Stage 2 sleep (N2) %   | 42.84% (SD=9.95%)        | 36.54% (SD=18.89%)       | $p=0.46$              |
| Stage 3 sleep (N3) %   | 29.79% (SD=11.57%)       | 32.66% (SD=15.08%)       | $p=0.70$              |
| Microarousals          | 14.79 (SD=13.03)         | 13.79 (SD=7.01)          | $p=0.86$              |
| Awakenings             | 36.07 (SD=16.60)         | 33.21 (SD=17.49)         | $p=0.76$              |
